# Supplementary material for: L-Arginine and SDMA Serum Concentrations Are Associated with Subclinical Atherosclerosis in the Study of Health in Pomerania (SHIP)
Source: PubMed Central journal article supplement (PMC4476678; doi:10.1371/journal.pone.0131293), 2015-06-22
Supplement: pone.0131293.s001.pdf [file pone.0131293.s001.pdf]

| OR (95% CI) for increased IMT |                          |             |                          |             |                                           |             |                                                                   |             |
|-------------------------------|--------------------------|-------------|--------------------------|-------------|-------------------------------------------|-------------|-------------------------------------------------------------------|-------------|
|                               | Unadjusted               | <i>P</i>    | Adjusted for sex and age | <i>P</i>    | Adjusted for age, sex, eGFR, smoking, WHR | <i>P</i>    | Adjusted for age, sex, eGFR, smoking, WHR, diabetes, hypertension | <i>P</i>    |
| <b>ADMA</b>                   |                          |             |                          |             |                                           |             |                                                                   |             |
| cont.*                        | 1.92 (0.92; 4.03)        | 0.08        | 1.79 (0.85; 3.77)        | 0.13        | 1.74 (0.82; 3.70)                         | 0.15        | 1.76 (0.82; 3.80)                                                 | 0.14        |
| categorized, ref: 33rd - 66th |                          |             |                          |             |                                           |             |                                                                   |             |
| < 33rd                        | 1.04 (0.81; 1.33)        | 0.78        | 1.04 (0.81; 1.33)        | 0.78        | 1.04 (0.81; 1.34)                         | 0.75        | 1.10 (0.90; 1.48)                                                 | 0.94        |
| > 66th                        | 1.12 (0.94; 1.53)        | 0.14        | 1.20 (0.94; 1.52)        | 0.15        | 1.18 (0.93; 1.51)                         | 0.17        | 1.15 (0.90; 1.50)                                                 | 0.26        |
| <b>SDMA</b>                   |                          |             |                          |             |                                           |             |                                                                   |             |
| cont.*                        | <b>2.62 (1.18; 5.84)</b> | <b>0.01</b> | <b>2.34 (1.01; 5.43)</b> | <b>0.05</b> | <b>2.51 (0.99; 6.32)</b>                  | <b>0.05</b> | <b>2.84 (1.11; 7.25)</b>                                          | <b>0.03</b> |
| categorized, ref: 33rd - 66th |                          |             |                          |             |                                           |             |                                                                   |             |
| < 33rd                        | 1.12 (0.87; 1.44)        | 0.37        | 1.12 (0.87; 1.44)        | 0.39        | 1.12 (0.87; 1.44)                         | 0.38        | 1.05 (0.81; 1.36)                                                 | 0.71        |
| > 66th                        | <b>1.38 (1.08; 1.76)</b> | <b>0.01</b> | <b>1.38 (1.08; 1.76)</b> | <b>0.01</b> | <b>1.39 (1.08; 1.79)</b>                  | <b>0.01</b> | <b>1.36 (1.05; 1.75)</b>                                          | <b>0.02</b> |
| <b>ARG</b>                    |                          |             |                          |             |                                           |             |                                                                   |             |
| cont.*                        | 1.00 (0.99; 1.00)        | 0.35        | 1.00 (0.99; 1.00)        | 0.32        | 1.00 (0.99; 1.00)                         | 0.39        | 1.00 (0.99; 1.00)                                                 | 0.44        |
| categorized, ref: 33rd - 66th |                          |             |                          |             |                                           |             |                                                                   |             |
| < 33rd                        | 0.86 (0.67; 1.11)        | 0.25        | 0.85 (0.67; 1.10)        | 0.21        | 0.86 (0.67; 1.10)                         | 0.23        | 0.84 (0.65; 1.08)                                                 | 0.34        |
| > 66th                        | 0.98 (0.77; 1.25)        | 0.85        | 0.96 (0.75; 1.23)        | 0.76        | 0.95 (0.74; 1.21)                         | 0.66        | 0.92 (0.72; 1.18)                                                 | 0.17        |
| <b>DMA</b>                    |                          |             |                          |             |                                           |             |                                                                   |             |
| cont.*                        | <b>1.70 (1.09; 2.64)</b> | <b>0.02</b> | <b>1.60 (1.01; 2.52)</b> | <b>0.05</b> | 1.59 (0.99; 2.55)                         | 0.06        | <b>1.65 (1.02; 2.66)</b>                                          | <b>0.04</b> |
| categorized, ref: 33rd - 66th |                          |             |                          |             |                                           |             |                                                                   |             |
| < 33rd                        | 1.07 (0.83; 1.37)        | 0.61        | 1.07 (0.83; 1.37)        | 0.61        | 1.07 (0.83; 1.38)                         | 0.60        | 1.07 (0.83; 1.39)                                                 | 0.59        |
| > 66th                        | <b>1.28 (0.99; 1.63)</b> | <b>0.05</b> | <b>1.28 (1.01; 1.64)</b> | <b>0.05</b> | 1.26 (0.99; 1.62)                         | 0.07        | <b>1.29 (1.00; 1.66)</b>                                          | <b>0.05</b> |
| <b>ARG/ADMA rat</b>           |                          |             |                          |             |                                           |             |                                                                   |             |
| cont.*                        | 1.00 (0.99; 1.00)        | 0.74        | 1.00 (0.99; 1.00)        | 0.62        | 1.00 (0.99; 1.00)                         | 0.67        | 1.00 (0.99; 1.00)                                                 | 0.69        |
| categorized, ref: 33rd - 66th |                          |             |                          |             |                                           |             |                                                                   |             |
| < 33rd                        | 0.96 (0.75; 1.22)        | 0.71        | 0.95 (0.74; 1.22)        | 0.68        | 0.96 (0.75; 1.23)                         | 0.74        | 0.93 (0.73; 1.20)                                                 | 0.6         |
| > 66th                        | 0.90 (0.71; 1.15)        | 0.41        | 0.90 (0.70; 1.15)        | 0.40        | 0.90 (0.71; 1.16)                         | 0.42        | 0.89 (0.70; 1.14)                                                 | 0.37        |
