# Supplementary material for: L-Arginine and SDMA Serum Concentrations Are Associated with Subclinical Atherosclerosis in the Study of Health in Pomerania (SHIP)
Source: PubMed Central journal article supplement (PMC4476678; doi:10.1371/journal.pone.0131293), 2015-06-22
Supplement: pone.0131293.s002.pdf [file pone.0131293.s002.pdf]

OR (95% CI) for presence of atherosclerotic plaque

|                               | Unadjusted                | P                | Adjusted for sex and age | P           | Adjusted for age, sex, eGFR, smoking, WHR | P           | Adjusted for age, sex, eGFR, smoking, WHR, diabetes, hypertension | P           |
|-------------------------------|---------------------------|------------------|--------------------------|-------------|-------------------------------------------|-------------|-------------------------------------------------------------------|-------------|
| <b>ADMA</b>                   |                           |                  |                          |             |                                           |             |                                                                   |             |
| cont.*                        | <b>4.38 (2.06; 9.16)</b>  | <b>&lt; 0.01</b> | 1.69 (0.72; 3.95)        | 0.23        | 1.69 (0.72; 4.01)                         | 0.23        | 1.69 (0.70; 4.10)                                                 | 0.24        |
| categorized, ref: 33rd - 66th |                           |                  |                          |             |                                           |             |                                                                   |             |
| < 33rd                        | 1.10 (0.87; 1.40)         | 0.41             | 1.08 (0.83; 1.41)        | 0.57        | 1.11 (0.85; 1.45)                         | 0.45        | 1.10 (0.84; 1.44)                                                 | 0.51        |
| > 66th                        | 1.25 (0.99; 1.58)         | 0.07             | 1.20 (0.92; 1.56)        | 0.19        | 1.21 (0.92; 1.58)                         | 0.17        | 1.19 (0.91; 1.56)                                                 | 0.21        |
| <b>SDMA</b>                   |                           |                  |                          |             |                                           |             |                                                                   |             |
| cont.*                        | <b>7.80 (3.30; 18.41)</b> | <b>&lt; 0.01</b> | <b>0.40 (0.15; 1.11)</b> | <b>0.08</b> | 0.93 (0.31; 2.74)                         | 0.89        | 1.00 (0.33; 3.01)                                                 | 0.99        |
| categorized, ref: 33rd - 66th |                           |                  |                          |             |                                           |             |                                                                   |             |
| < 33rd                        | 1.07 (0.84; 1.36)         | 0.59             | 1.10 (0.84; 1.44)        | 0.51        | 1.05 (0.80; 1.38)                         | 0.74        | 0.99 (0.75; 1.31)                                                 | 0.93        |
| > 66th                        | 0.93 (0.74; 1.17)         | 0.54             | 0.83 (0.64; 1.09)        | 0.18        | 0.94 (0.72; 1.26)                         | 0.66        | 0.91 (0.69; 1.20)                                                 | 0.51        |
| <b>ARG</b>                    |                           |                  |                          |             |                                           |             |                                                                   |             |
| cont.*                        | 1.00 (0.99; 1.00)         | 0.58             | 1.00 (0.99; 1.00)        | 0.19        | 1.00 (0.99; 1.00)                         | 0.30        | 1.00 (0.99; 1.00)                                                 | 0.33        |
| categorized, ref: 33rd - 66th |                           |                  |                          |             |                                           |             |                                                                   |             |
| < 33rd                        | 1.09 (0.86; 1.37)         | 0.50             | 1.11 (0.85; 1.45)        | 0.45        | 1.15 (0.87; 1.51)                         | 0.51        | 1.15 (0.87; 1.51)                                                 | 0.33        |
| > 66th                        | <b>1.31 (1.03; 1.66)</b>  | <b>0.03</b>      | <b>1.41 (1.08; 1.85)</b> | <b>0.01</b> | <b>1.41 (1.07; 1.85)</b>                  | <b>0.01</b> | <b>1.41 (1.07; 1.85)</b>                                          | <b>0.02</b> |
| <b>DMA</b>                    |                           |                  |                          |             |                                           |             |                                                                   |             |
| cont.*                        | <b>3.14 (1.98; 4.97)</b>  | <b>&lt; 0.01</b> | 0.97 (0.57; 1.66)        | 0.90        | 1.21 (0.70; 2.09)                         | 0.50        | 1.24 (0.71; 2.17)                                                 | 0.45        |
| Categorized, ref: 33rd - 66th |                           |                  |                          |             |                                           |             |                                                                   |             |
| < 33rd                        | 0.99 (0.78; 1.25)         | 0.90             | 1.01 (0.77; 1.33)        | 0.92        | 1.00 (0.76; 1.32)                         | 0.99        | 1.01 (0.77; 1.34)                                                 | 0.92        |
| > 66th                        | 0.98 (0.77; 1.24)         | 0.85             | 0.91 (0.70; 1.20)        | 0.51        | 0.97 (0.74; 1.28)                         | 0.85        | 1.00 (0.76; 1.31)                                                 | 0.97        |
| <b>ARG/ADMA rat</b>           |                           |                  |                          |             |                                           |             |                                                                   |             |
| cont.*                        | 0.99 (0.99; 1.00)         | 0.09             | 1.00 (0.99; 1.00)        | 0.72        | 1.00 (0.99; 1.00)                         | 0.86        | 1.00 (0.99; 1.00)                                                 | 0.88        |
| Categorized, ref: 33rd - 66th |                           |                  |                          |             |                                           |             |                                                                   |             |
| < 33rd                        | 0.95 (0.75; 1.21)         | 0.69             | 0.93 (0.71; 1.22)        | 0.59        | 0.96 (0.73; 1.27)                         | 0.57        | 0.95 (0.72; 1.26)                                                 | 0.74        |
| > 66th                        | 0.97 (0.76; 1.23)         | 0.78             | 0.99 (0.76; 1.30)        | 0.95        | 1.01 (0.77; 1.33)                         | 0.67        | 1.01 (0.77; 1.34)                                                 | 0.92        |
